# Supplementary material for: Water footprint of crop production for different crop structures in the Hebei southern plain, North China
Source: Copernicus journal article supplement (doi:10.5194/hess-21-3061-2017), 2017-06-26
Supplement: Supplementary file 1 [file Copy of Data.xlsx]

## Sheet: Yearly WF of  crops
2000	Wfgreen	Wfblue	Wfgrey	WF
Winter wheat	2.18188	9.07334	7.38395	18.6392
Summer maize	5.87537	6.36782	4.43037	16.6736
Spring maize	0.68616	1.15782	0.486486	2.33046
Cotton	1.00697	2.21881	0.698559	3.92433
Peanut	0.383655	1.06237	0.242077	1.6881
Rice	0.0753314	0.34309	0.0877331	0.506154
Vegetables	1.05464	4.7938	1.34396	7.19239
Fruiters	0.312038	1.01181	0.735689	2.05954
Others	0.139921	0.590595	0.173085	0.903602
2001	Wfgreen	Wfblue	Wfgrey	WF
Winter wheat	1.78435	8.18929	6.29904	16.2727
Summer maize	4.36864	5.97035	3.77942	14.1184
Spring maize	0.611718	1.10879	0.458822	2.17933
Cotton	0.751461	2.28925	0.643576	3.68429
Peanut	0.396016	1.17968	0.268634	1.84433
Rice	0.0754884	0.389479	0.097358	0.562325
Vegetables	0.964242	5.53363	1.4914	7.98928
Fruiters	0.249021	1.12355	0.769689	2.14226
Others	0.179063	0.669334	0.192074	1.04047
2002	Wfgreen	Wfblue	Wfgrey	WF
Winter wheat	2.29906	6.69077	5.69828	14.6881
Summer maize	3.98248	5.59153	3.41897	12.993
Spring maize	0.681641	1.06598	0.488545	2.23617
Cotton	1.27241	3.01787	0.908958	5.19924
Peanut	0.427318	0.964279	0.246645	1.63824
Rice	0.0733821	0.334875	0.0893888	0.497646
Vegetables	1.04825	4.73953	1.36932	7.1571
Fruiters	0.371209	1.0711	0.848511	2.29082
Others	0.188645	0.513954	0.176352	0.878951
2003	Wfgreen	Wfblue	Wfgrey	WF
Winter wheat	2.97937	5.34046	6.10029	14.4201
Summer maize	4.92601	3.91185	3.66018	12.498
Spring maize	0.721498	0.837188	0.469642	2.02833
Cotton	0.586488	0.898126	0.352949	1.83756
Peanut	0.596872	1.08767	0.326064	2.01061
Rice	0.0774714	0.246129	0.0782543	0.401855
Vegetables	1.27465	4.23538	1.41847	6.9285
Fruiters	0.396201	0.799878	0.762922	1.959
Others	0.444519	0.838181	0.352949	1.63565
2004	Wfgreen	Wfblue	Wfgrey	WF
Winter wheat	2.51818	7.11931	6.02705	15.6645
Summer maize	4.74852	4.46684	3.61623	12.8316
Spring maize	1.01682	1.0258	0.611329	2.65395
Cotton	0.683347	1.21293	0.431442	2.32772
Peanut	0.582943	0.942219	0.285954	1.81112
Rice	0.0656365	0.238395	0.0686279	0.37266
Vegetables	1.28401	4.65907	1.45402	7.3971
Fruiters	0.334883	0.801588	0.696299	1.83277
Others	0.229086	0.574873	0.204457	1.00842
2005	Wfgreen	Wfblue	Wfgrey	WF
Winter wheat	1.76744	7.61057	6.15905	15.5371
Summer maize	5.06596	4.86882	3.69543	13.6302
Spring maize	0.668029	0.89314	0.424849	1.98602
Cotton	1.03016	1.89478	0.629527	3.55446
Peanut	0.461757	1.03873	0.259457	1.75995
Rice	0.0561813	0.23746	0.0622688	0.35591
Vegetables	1.20825	5.05331	1.44045	7.70202
Fruiters	0.370574	1.0504	0.807236	2.22821
Others	0.175695	0.607864	0.185512	0.969071
2006	Wfgreen	Wfblue	Wfgrey	WF
Winter wheat	2.14051	7.2523	6.17201	15.5648
Summer maize	3.94094	5.53482	3.7032	13.179
Spring maize	0.884999	1.02426	0.550816	2.46008
Cotton	0.696172	1.67724	0.530007	2.90342
Peanut	0.459417	0.897158	0.250823	1.6074
Rice	0.0414225	0.226982	0.0601966	0.328601
Vegetables	0.981047	4.77025	1.39252	7.14381
Fruiters	0.30157	0.803482	0.661655	1.76671
Others	0.176608	0.541235	0.179339	0.897182
2007	Wfgreen	Wfblue	Wfgrey	WF
冬小麦	2.19544	6.79743	5.59314	14.586
夏玉米	4.60798	4.1634	3.35588	12.1273
春玉米	1.01919	1.30912	0.656083	2.98439
棉花	1.43351	2.52901	0.874281	4.8368
花生	0.413556	0.969937	0.248307	1.6318
水稻	0.0800966	0.335433	0.0899912	0.505521
蔬菜	1.15442	4.63976	1.37855	7.17273
果树	0.353457	1.03044	0.803684	2.18759
其他	0.195844	0.529684	0.17754	0.903068
2008	Wfgreen	Wfblue	Wfgrey	WF
Winter wheat	2.54931	6.83857	6.07803	15.4659
Summer maize	4.81109	4.5768	3.64682	13.0347
Spring maize	0.79178	0.950266	0.522748	2.26479
Cotton	0.915596	1.58662	0.577591	3.07981
Peanut	0.499037	0.922017	0.267629	1.68868
Rice	0.0653307	0.210919	0.0642299	0.34048
Vegetables	1.31948	4.59867	1.48582	7.40397
Fruiters	0.485591	0.936518	0.885968	2.30808
Others	0.248225	0.467703	0.191355	0.907283
2009	Wfgreen	Wfblue	Wfgrey	WF
Winter wheat	3.23799	6.70041	6.2965	16.2349
Summer maize	4.44695	5.48415	3.7779	13.709
Spring maize	0.716963	0.988564	0.454642	2.16017
Cotton	0.684265	1.49316	0.46795	2.64538
Peanut	0.532318	0.966981	0.261243	1.76054
Rice	0.0535712	0.238176	0.0626974	0.354444
Vegetables	1.30333	4.99321	1.45037	7.74691
Fruiters	0.443884	1.02792	0.844737	2.31654
Others	0.238412	0.562256	0.186789	0.987457
2010	Wfgreen	Wfblue	Wfgrey	WF
Winter wheat	2.13078	6.40397	5.81101	14.3458
Summer maize	4.60484	4.29274	3.48661	12.3842
Spring maize	0.912504	1.12378	0.606266	2.64255
Cotton	0.76974	1.41011	0.499324	2.67917
Peanut	0.490216	0.913099	0.259316	1.66263
Rice	0.0564142	0.215167	0.0622349	0.333816
Vegetables	1.21342	4.5698	1.43967	7.22288
Fruiters	0.396262	0.893432	0.793495	2.08319
Others	0.206682	0.49981	0.185411	0.891903
2011	Wfgreen	Wfblue	Wfgrey	WF
Winter wheat	2.1133	6.00089	5.16367	13.2779
Summer maize	3.98142	3.73496	3.0982	10.8146
Spring maize	0.832822	1.09001	0.544824	2.46766
Cotton	1.12471	2.02392	0.717018	3.86565
Peanut	0.480645	1.00437	0.271683	1.7567
Rice	0.0561785	0.236527	0.065203	0.357909
Vegetables	1.31496	4.85108	1.50833	7.67436
Fruiters	0.342989	0.872331	0.727493	1.94281
Others	0.181765	0.624139	0.194254	1.00016
2012	Wfgreen	Wfblue	Wfgrey	WF
Winter wheat	2.07183	5.07599	4.8175	11.9653
Summer maize	3.57188	3.67846	2.8905	10.1408
Spring maize	0.940641	1.293	0.6525	2.88614
Cotton	0.948429	2.11929	0.70125	3.76897
Peanut	0.468795	0.845927	0.249999	1.56472
Rice	0.0564534	0.208673	0.059999	0.325126
Vegetables	1.31496	4.85108	1.50833	7.67436
Fruiters	0.491422	1.10188	0.978752	2.57206
Others	0.205684	0.500007	0.17875	0.884441

## Sheet: Yearly planting area of  crops
Year	Winter wheat-summer maize	Spring maize	Vegetables	Fruiters	Cotton	Peanut	Rice	Others	Total
2000	29.5358	3.89189	6.71979	1.96184	5.58847	2.43558	0.438666	1.38468	51.9419
2001	25.1961	3.67058	7.457	2.0525	5.14861	2.68634	0.48679	1.53659	48.2346
2002	22.7931	3.90836	6.84661	2.2627	7.27166	2.46645	0.446944	1.41081	47.4066
2003	24.4012	3.75714	7.09233	2.03446	2.82359	3.26064	0.391271	1.86509	45.6257
2004	24.1082	4.89063	7.27009	1.8568	3.45154	2.85954	0.343139	1.63566	46.4156
2005	24.6362	3.3988	7.20225	2.15263	5.03622	2.59457	0.311344	1.4841	46.8161
2006	24.688	4.40653	6.96258	1.76441	4.24005	2.50823	0.300983	1.43471	46.3055
2007	22.3725	5.24866	6.89274	2.14316	6.99424	2.48307	0.449956	1.42032	48.0047
2008	24.3121	4.18198	7.42909	2.36258	4.62073	2.67629	0.32115	1.53084	47.4348
2009	25.186	3.63714	7.25183	2.25263	3.7436	2.61243	0.313487	1.49431	46.4914
2010	23.244	4.85013	7.19834	2.11599	3.99459	2.59316	0.311175	1.48329	45.7907
2011	20.6547	4.35859	7.54163	1.93998	5.73615	2.71683	0.326015	1.55403	44.8279
2012	19.27	5.22	8.46999	2.61001	5.61	2.49999	0.299995	1.43	45.41
Change(%）	-34.7572	34.1251	26.0455	33.0388	0.385314	2.64452	-31.6119	3.27282	-12.5755

## Sheet: Scenario analysis
Crop structure	WFgreen	WFblue	Wfgrey	WF
Baseline	10.0701	19.6743	12.0376	41.782
Scenario 1	9.88857	19.2363	11.6723	40.7972
Scenario 2	9.37702	18.2983	10.4238	38.0992
Scenario 3	8.86547	17.3603	9.17533	35.4011
Scenario 4	8.35392	16.4224	7.92683	32.7031
Scenario 5	7.93247	15.6082	6.74083	30.2815
Scenario 6	9.11995	16.8141	9.58625	35.5203
Scenario7	9.09164	18.6073	9.9255	37.6245
Scenario8	9.15485	17.6037	10.72	37.4786
