# Supplementary material for: Water footprint of crop production for different crop structures in the Hebei southern plain, North China
Source: Copernicus journal article supplement (doi:10.5194/hess-21-3061-2017), 2017-06-26
Supplement: Supplementary file 1 [file hess-21-3061-2017-supplement.zip]

Archive with 2 entries (2 files):
- hess-21-3061-2017-supplement-title-page.pdf
- Copy of Data.xlsx
