# Supplementary material for: Water footprint of crop production for different crop structures in the Hebei southern plain, North China
Source: Copernicus journal article supplement (doi:10.5194/hess-21-3061-2017), 2017-06-26
Supplement: Supplementary file 1 [file hess-21-3061-2017-supplement.zip › hess-21-3061-2017-supplement-title-page.pdf]

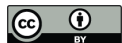

## *Supplement of*

# **Water footprint of crop production for different crop structures in the Hebei southern plain, North China**

**Yingmin Chu et al.**

*Correspondence to:* Zaijian Yuan (selfsurpass@163.com)

- [hess-21-3061-2017-supplement-title-page.pdf](#)
- [Copy of Data.xlsx](#)

The copyright of individual parts of the supplement might differ from the CC BY 3.0 License.
